# Supplementary material for: 100 years of lake evolution over the Qinghai-Tibet Plateau
Source: Copernicus journal article supplement (doi:10.5194/essd-2021-130), 2021-04-22
Supplement: Supplementary file 1 [file essd-2021-130-supplement.pdf]

*Supplement of*

## **100 years of lake evolution over the Qinghai-Tibet Plateau**

**Guoqing Zhang e al.**

Correspondences: Guoqing Zhang (guoqing.zhang@itpcas.ac.cn) and Youhua Ran (ranyh@lzb.ac.cn)

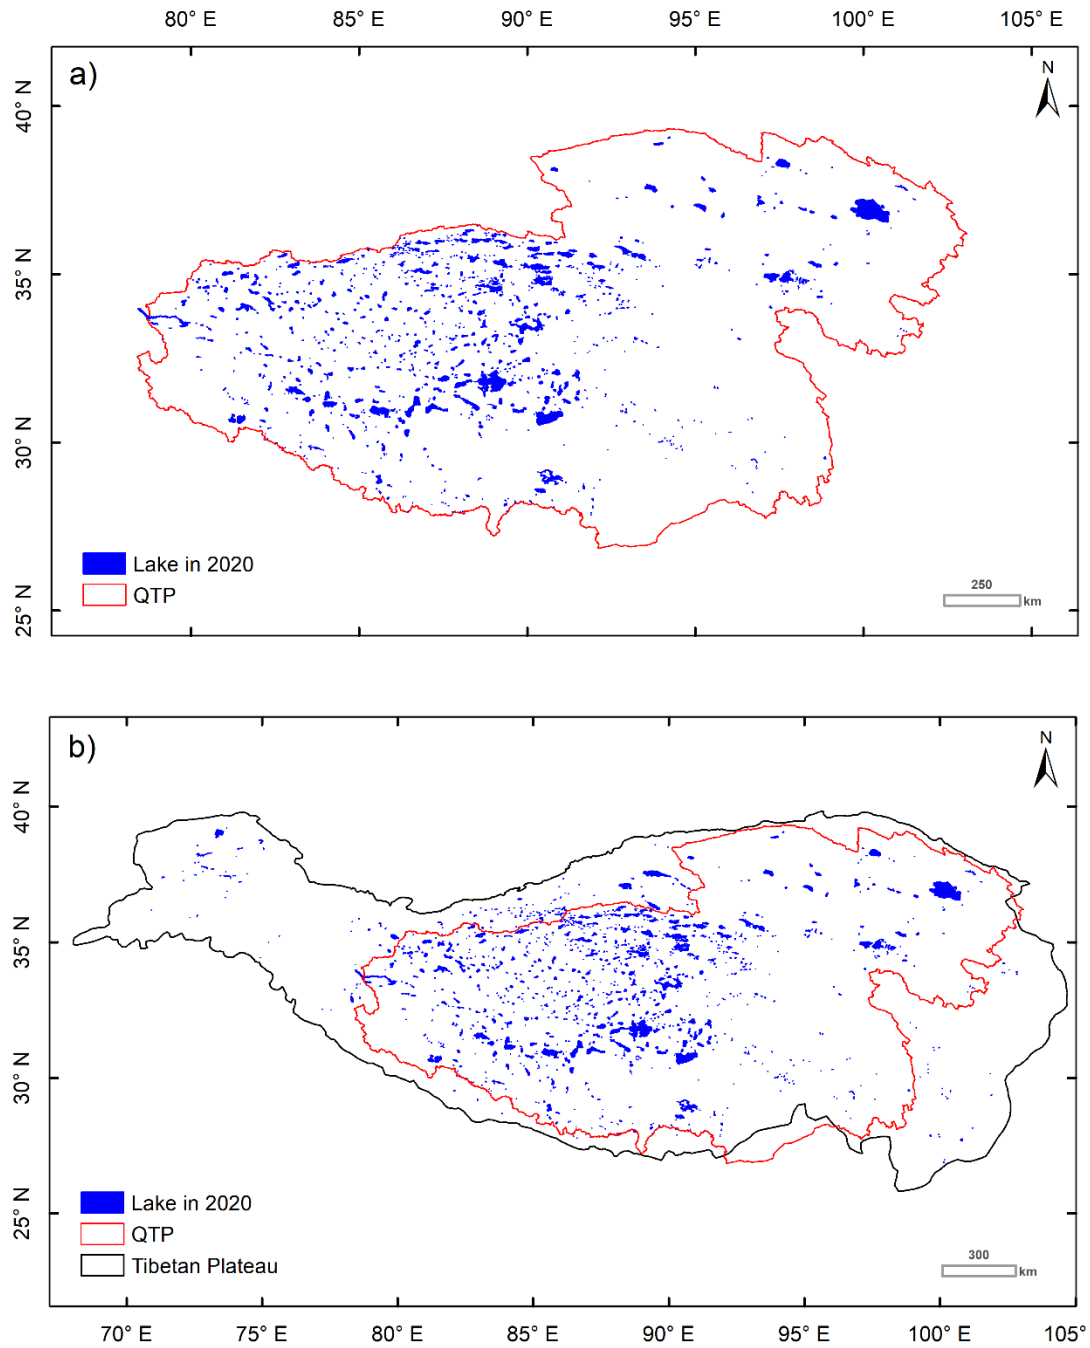

**Figure S1.** The differences of boundaries between QTP and TP. a) Lake distribution over the QTP. b) Lake distribution over the TP. The boundary of QTP is also overlapped to differentiate between them.

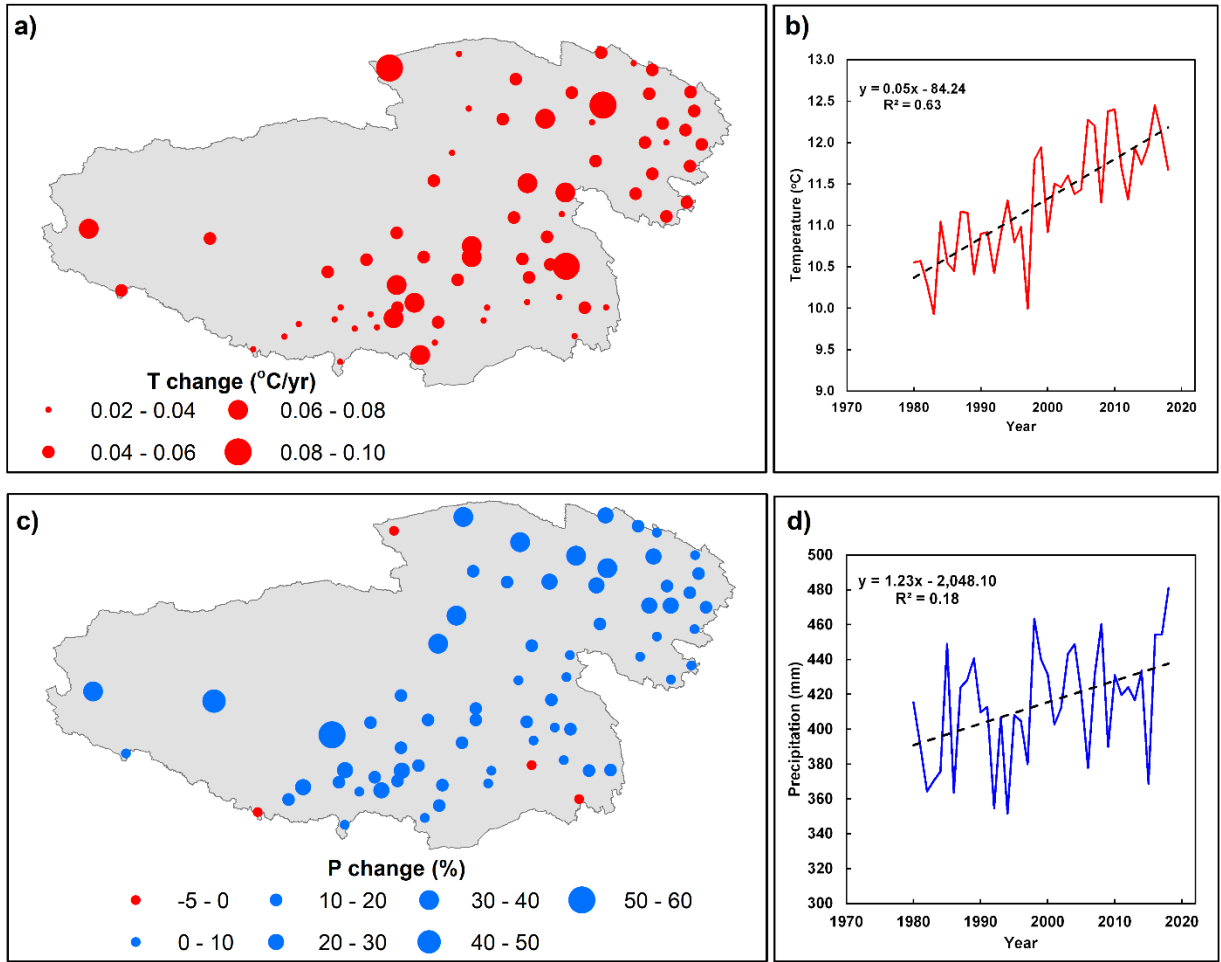

**Figure S2.** The changes in temperature (T) and precipitation (P) from CMA stations between 1980 and 2018. a) The spatial difference of temperature change. b) Time series of temperature change. c) The spatial difference of precipitation change. The difference of average between 1980–1998 and 1999–2018 was used. d) Time series of precipitation change.
